# Supplementary material for: A GGA + U investigation into the effects of cations on the electromagnetic properties of transition metal spinels
Source: Royal Society of Chemistry journal article supplement (doi:10.1039/d1ra03621a), 2021-01-01
Supplement: d1ra03621a1.pdf [file d1ra03621a1.pdf]

ARTICLE

Supporting Information

for

**A GGA + U investigation into the effects of cations on the electromagnetic properties of transition metal spinels<sup>†</sup>**

Chunyu Li,<sup>a</sup> Peng Li,<sup>a</sup> Leyun Li,<sup>a</sup> Dingjia Wang,<sup>a</sup> Xingfa Gao,<sup>\*b</sup> and Xuejiao J. Gao<sup>\*a</sup>

<sup>a</sup> College of Chemistry and Chemical Engineering, Jiangxi Normal University, Nanchang, 330022, China.

<sup>b</sup> Laboratory of Theoretical and Computational Nanoscience, CAS Key Laboratory for Biomedical Effects of Nanomaterials and Nanosafety, National Center for Nanoscience and Technology, Chinese Academy of Sciences. Beijing, 100190, China.

**Table S1.** Hubbard  $U_{\text{eff}}$  (eV) values employed for metal ions.

| M                | Mn <sup>T</sup> | Mn <sup>O</sup> | Fe <sup>T</sup> | Fe <sup>O</sup> | Co <sup>T</sup> | Co <sup>O</sup> | Ni <sup>T</sup> | Ni <sup>O</sup> | Cr <sup>O</sup> |
|------------------|-----------------|-----------------|-----------------|-----------------|-----------------|-----------------|-----------------|-----------------|-----------------|
| $U_{\text{eff}}$ | 4.0             | 3.5             | 4.3             | 4.0             | 4.5             | 6.5             | 5.0             | 6.4             | 4.0             |

<sup>T</sup>the tetrahedral sites.

<sup>O</sup>the octahedral sites.

**Table S2.** The calculated energies (in eV) for spinels with different magnetic states

| Spinel                           | AFM   | FM    | FM'   |
|----------------------------------|-------|-------|-------|
| MnCr <sub>2</sub> O <sub>4</sub> | 0.000 | 0.428 | 0.057 |
| FeCr <sub>2</sub> O <sub>4</sub> | 0.094 | 0.590 | 0.000 |
| CoCr <sub>2</sub> O <sub>4</sub> | 0.248 | 0.805 | 0.000 |
| NiCr <sub>2</sub> O <sub>4</sub> | 0.270 | 0.853 | 0.000 |
| ZnCr <sub>2</sub> O <sub>4</sub> | 0.000 | 0.182 |       |
| ZnMn <sub>2</sub> O <sub>4</sub> | 0.000 | 0.889 |       |
| ZnFe <sub>2</sub> O <sub>4</sub> | 0.000 | 0.381 |       |
| ZnCo <sub>2</sub> O <sub>4</sub> | 0.000 | 1.070 |       |
| ZnNi <sub>2</sub> O <sub>4</sub> | 0.278 | 0.000 |       |
| LiCr <sub>2</sub> O <sub>4</sub> | 0.000 | 0.179 |       |
| LiMn <sub>2</sub> O <sub>4</sub> | 0.000 | 0.167 |       |
| LiFe <sub>2</sub> O <sub>4</sub> | 0.000 | 0.824 |       |
| LiCo <sub>2</sub> O <sub>4</sub> | 0.000 | 1.031 |       |
| LiNi <sub>2</sub> O <sub>4</sub> | 0.136 | 0.000 |       |

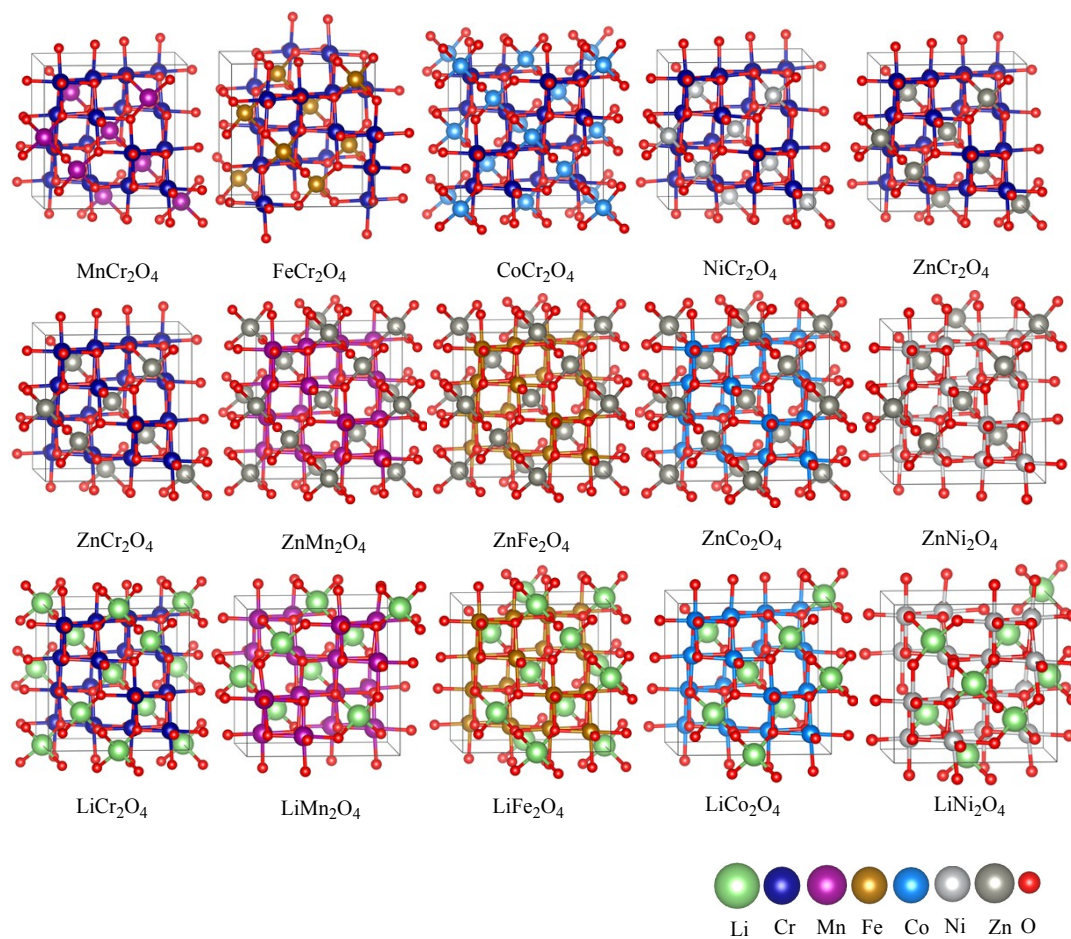

**Figure S1.** Optimized bulk structures for spinels.
